# Supplementary material for: Tuning copper sulfide nanosheets by cation exchange reactions to realize two-dimensional CZTS dielectric layers
Source: Royal Society of Chemistry journal article supplement (doi:10.1039/c9ta00370c), 2019-01-01
Supplement: c9ta00370c1.pdf [file c9ta00370c1.pdf]

## Supplementary Information

# Tuning Copper Sulfide Nanosheets by Cation Exchange Reactions to Realize Two-dimensional CZTS Dielectric Layers

*Ali Hossain Khan,<sup>†</sup> Somnath Pal,<sup>‡</sup> Amit Dalui,<sup>†</sup> Bapi Pradhan,<sup>†</sup> D. D. Sarma,<sup>‡</sup> Somabrata Acharya<sup>\*,†</sup>*

<sup>†</sup>Centre for Advanced Materials, Indian Association for the Cultivation of Science, Jadavpur, Kolkata 700032, India

<sup>‡</sup>Solid State and Structural Chemistry Unit, Indian Institute of Science, Bangalore 560012, India

\*Corresponding author. E-mail: [camsa2@iacs.res.in](mailto:camsa2@iacs.res.in)

### Table of Contents

|                                                                       |         |
|-----------------------------------------------------------------------|---------|
| 1. Annealing time variation TEM images of Cu <sub>2</sub> S NSs ..... | Fig. S1 |
| 2. Ligand controlled TEM images of Cu <sub>2</sub> S NCs .....        | Fig. S2 |
| 3. Tauc plot of CZTS NSs .....                                        | Fig. S3 |
| 4. Moiré interference patterns of CZTS NSs .....                      | Fig. S4 |
| 5. Colloidal solutions of ligand exchange CZTS NSs.....               | Fig. S5 |
| 6. TEM image of CZTS NSs after ligand exchange .....                  | Fig. S6 |
| 7. HRTEM of the CZTS NSs.....                                         | Fig. S7 |
| 8. SAED patterns of the CZTS NSs .....                                | Fig. S8 |
| 9. AFM on the ligand exchanged CZTS NSs .....                         | Fig. S9 |

|                                                                                  |          |
|----------------------------------------------------------------------------------|----------|
| 10. XPS survey spectrum of CZTS NSs .....                                        | Fig. S10 |
| 11. High resolution XPS spectra of CZTS NSs .....                                | Fig. S11 |
| 12. TEM image & EDS spectrum Tin doped Cu <sub>2</sub> S NSs .....               | Fig. S12 |
| 13. Precursor tuned EDS compositions.....                                        | Table S1 |
| 14. Cation exchange with equal mole of Zn and Sn salts.....                      | Fig. S13 |
| 15. Cation exchange in presence of oleylamine .....                              | Fig. S14 |
| 16. Cross-sectional SEM image of dielectric device.....                          | Fig. S15 |
| 17. Dielectric comparison of CZTS NSs with established dielectric materials..... | Table S2 |
| 18. Impedance parameters at different temperatures.....                          | Table S3 |
| 19. AC conductivity vs 1/T plots at different frequencies.....                   | Fig. S16 |

### Supplementary Information Figures

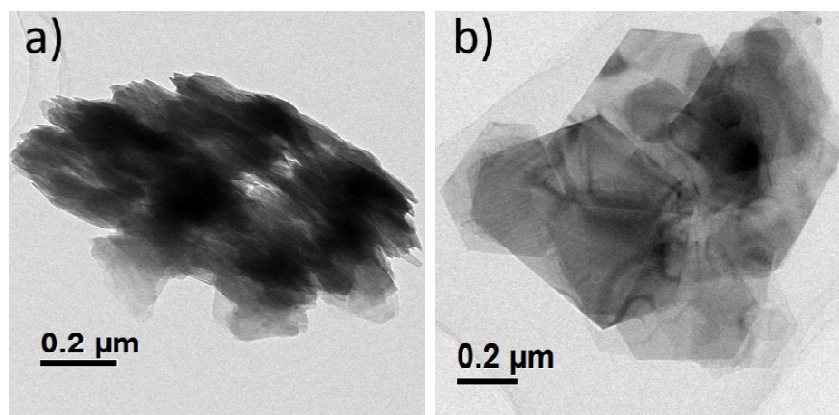

**Fig. S1** TEM images of Cu<sub>2</sub>S NSs synthesized at 240°C with annealing time of (a) 10 mins and (b) 60 mins.

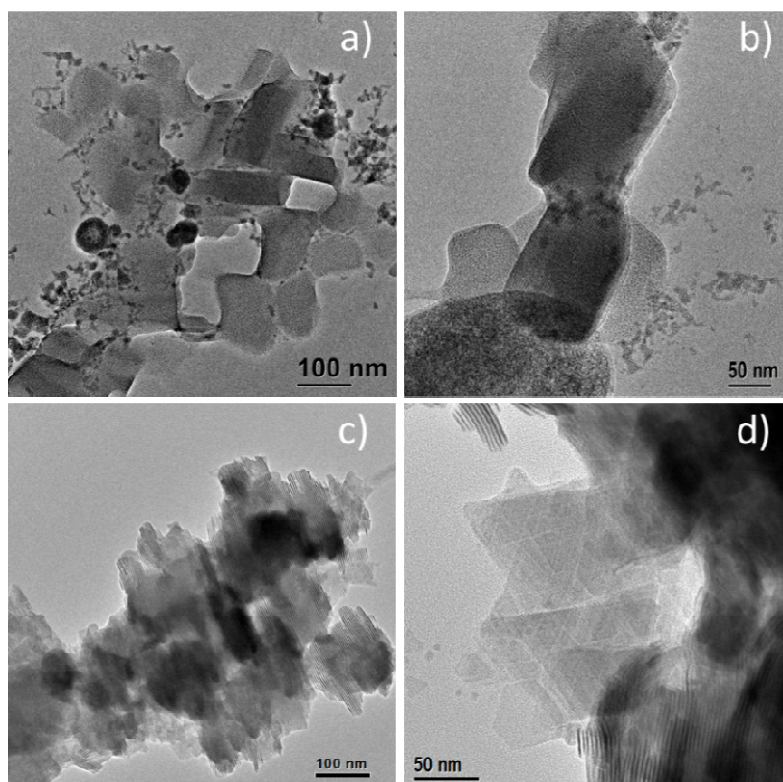

**Fig. S2** TEM images of  $\text{Cu}_2\text{S}$  NCs synthesized at  $240^\circ\text{C}$  (a, b) without TOPO and (c, d) without oleic acid.

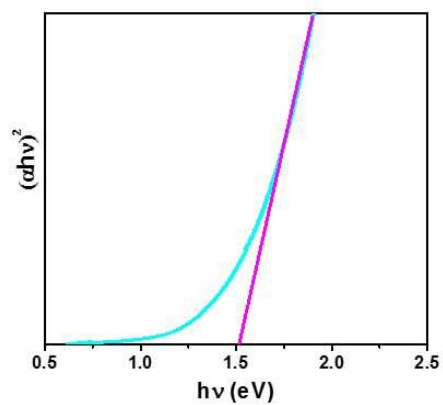

**Fig. S3** Tauc plot of CZTS NSs for the determination of band gap threshold of the synthesized NS. The band gap energy of CZTS NSs has been determined from the UV-vis spectrum to be 1.50 eV by extrapolation of the linear region of a plot of  $(\alpha hv)^2$  versus photon energy ( $h\nu$ ), where  $\alpha$  represents the absorption coefficient.

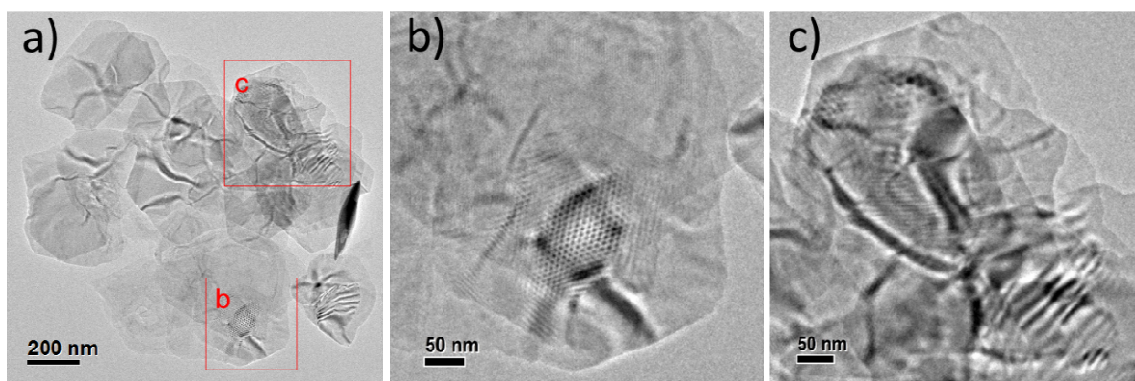

**Fig. S4** (a) TEM image of CZTS NSs. (b, c) Magnified areas of CZTS NSs showing Moiré pattern for the overlapped NSs with rotational offsets of the crystal lattice.

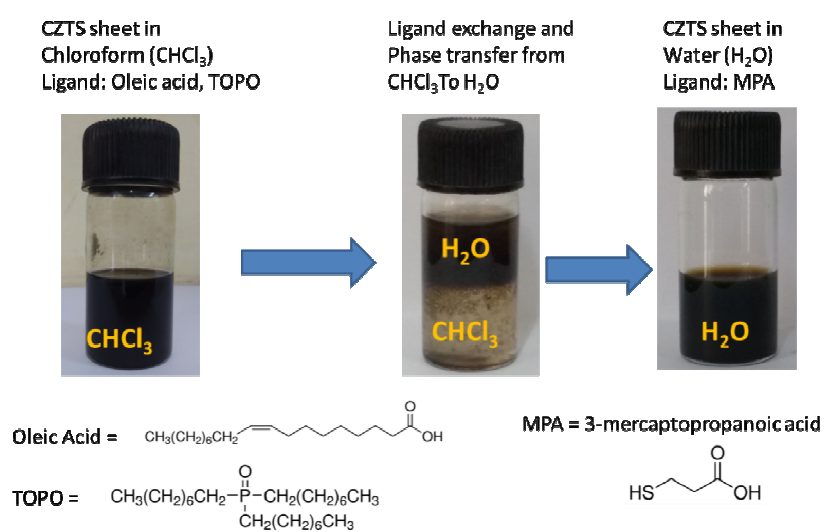

**Fig. S5** Photograph of colloidal solutions showing the ligand exchange and phase transfer process of CZTS NSs from chloroform to water.

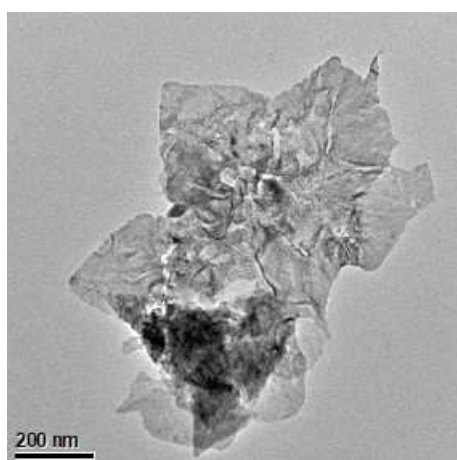

**Fig. S6** TEM image of CZTS NSs after ligand exchange.

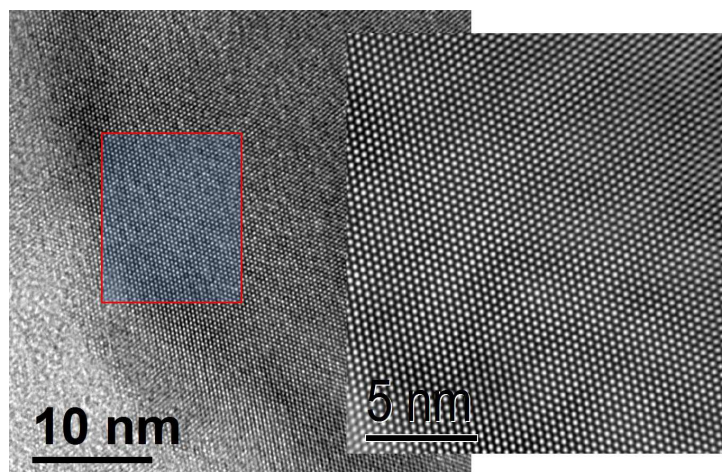

**Fig. S7** HRTEM image of a single CZTS NS showing the well resolved atoms indicating the single crystalline nature of the NS.

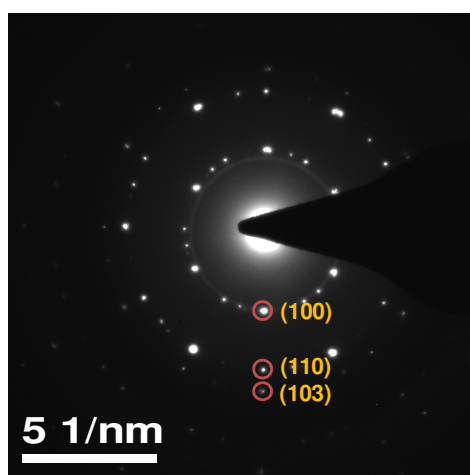

**Fig. S8** SAED pattern of the CZTS NSs, which is showing the diffraction spot corresponding to reflection of different planes of wurtzite crystal structure.

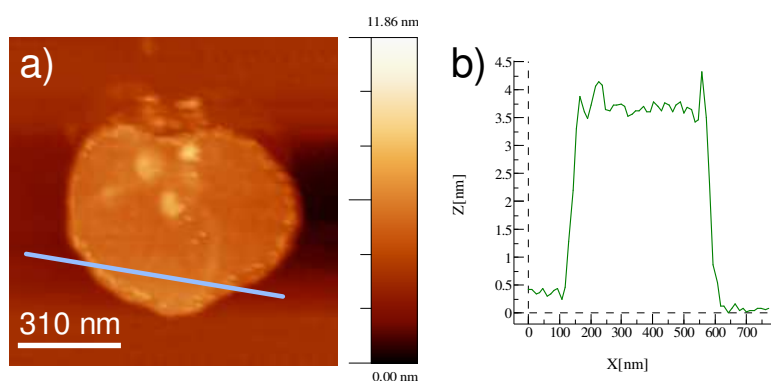

**Fig. S9** (a) Tapping mode AFM image of the ligand exchange CZTS nanosheets. (b) Height profiles obtained from the AFM image along the cyan line.



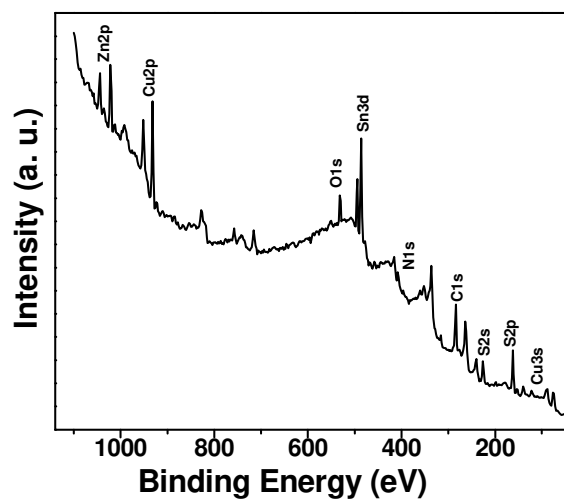

**Fig. S10** X-ray photoelectron survey spectrum of the CZTS NSs showing the different constituent elements present within the NSs.

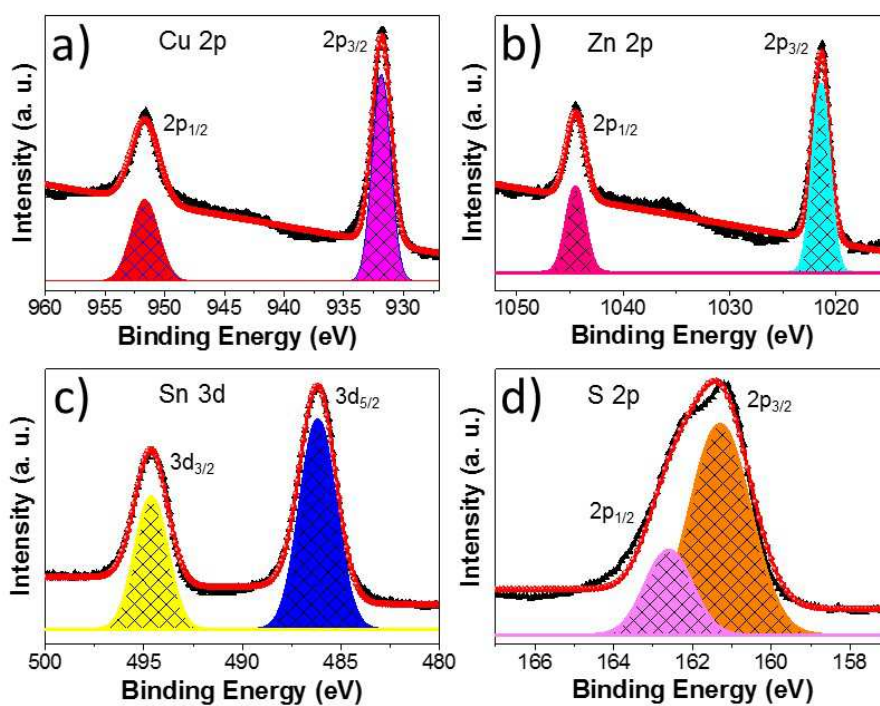

**Fig. S11** High-resolution XPS spectra of (a) Cu, (b) Zn (c) Sn, and (d) S of CZTS NSs.

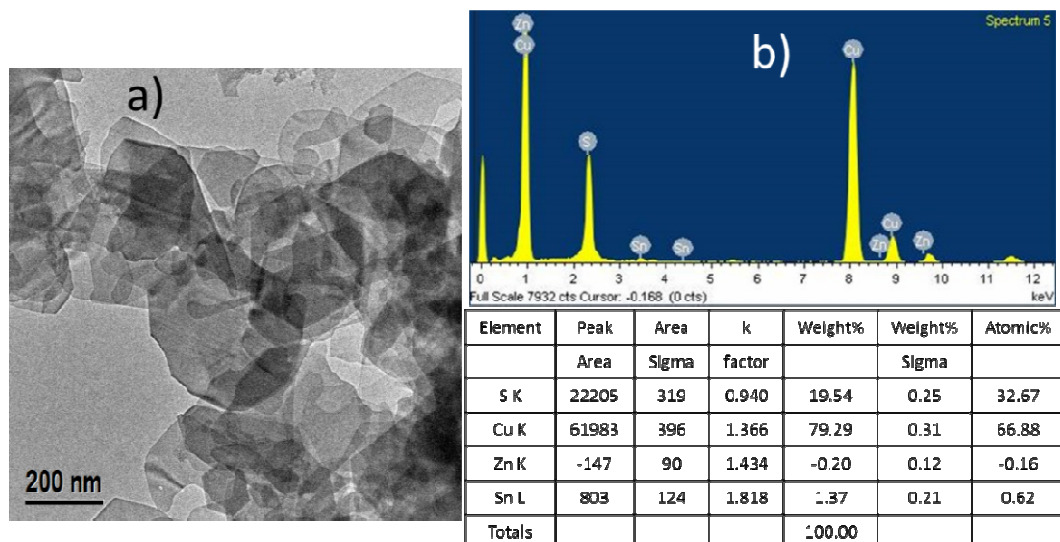

**Fig. S12** (a) The TEM image and (b) EDS spectrum and elemental analysis of Tin doped  $\text{Cu}_2\text{S}$  NSs synthesized via one pot synthesis (following the  $\text{Cu}_2\text{S}$  NSs preparation procedure) using the 2:1:1 mole ratio of Cu(I)/Zn(II)/Sn(IV).

**Table S1** Amount of precursors used for the cation exchange reaction and the final composition of the ions in the NSs.

| $\text{Cu}_2\text{S}$ NSs (mmole) | Zn(OAc) (mmole) | ZnCl <sub>2</sub> (mmole) | Zn(acac) <sub>2</sub> (mmole) | SnCl <sub>4</sub> (mmole) | SnCl <sub>2</sub> (acac) <sub>2</sub> (mmole) | Zn:Sn used | Ligands used | TEM grid used | S:Cu:Zn:Sn from TEM-EDS |
|-----------------------------------|-----------------|---------------------------|-------------------------------|---------------------------|-----------------------------------------------|------------|--------------|---------------|-------------------------|
| 0.5                               | 0.25            | --                        | --                            | 0.25                      | --                                            | 1:1        | 0.5mL DDT    | Au            | 44 : 37 : 1 : 18        |
| 0.5                               | --              | 0.25                      | --                            | 0.25                      | --                                            | 1:1        | 0.5mL DDT    | Cu            | 35 : 56 : 0.33 : 8      |
| 0.5                               | --              | 1.5                       | --                            | 0.25                      | --                                            | 6:1        | 1mL DDT      | Cu            | 39 : 42 : 3 : 16        |
| 0.5                               | --              | 0.0625                    | --                            | --                        | 0.25                                          | 1:4        | 0.5mL OLA    | Cu            | 25 : 56 : 18 : 3        |
| 0.5                               | --              | 0.05                      | --                            | --                        | 0.3                                           | 1:6        | 0.5mL OLA    | Au            | 43 : 36 : 15 : 7        |
| 0.5                               | --              | --                        | 0.03                          | --                        | 0.3                                           | 1:10       | 0.5mL OLA    | Au            | 49 : 32 : 10 : 9        |
| 0.5                               | --              | --                        | 0.03                          | --                        | 0.322                                         | 1:10.7     | 0.5mL OLA    | Au            | 49 : 32 : 11 : 9        |
| 0.5                               | --              | --                        | 0.04                          | --                        | 0.4                                           | 1:10       | 0.5mL OLA    | Au            | 49 : 27 : 11 : 12       |

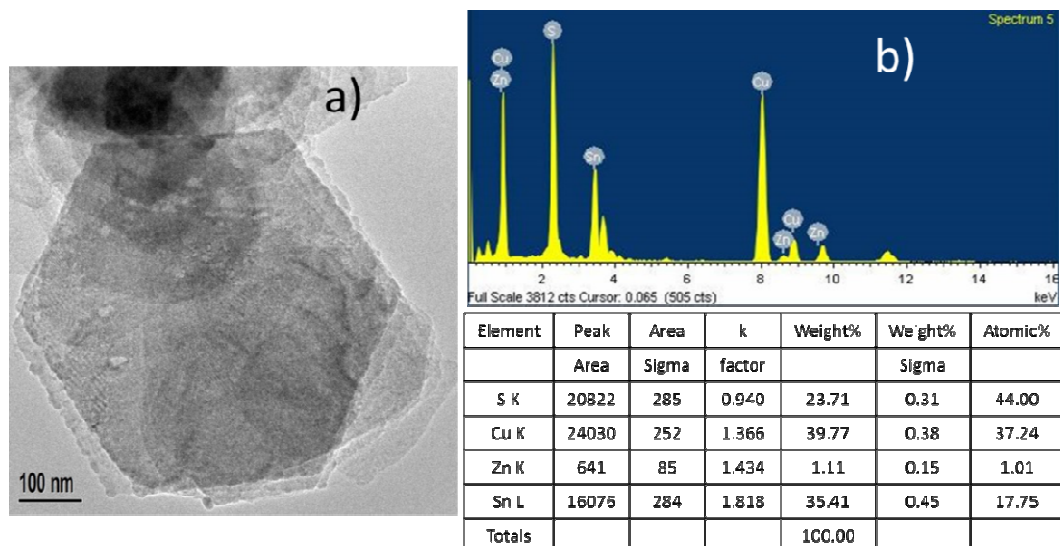

**Fig. S13** (a) The TEM image and (b) EDS spectrum and elemental analysis of CZTS NSs synthesized by cation exchange of  $\text{Cu}_2\text{S}$  NSs with equal amounts (moles) of Zn and Sn in the presence of DDT.

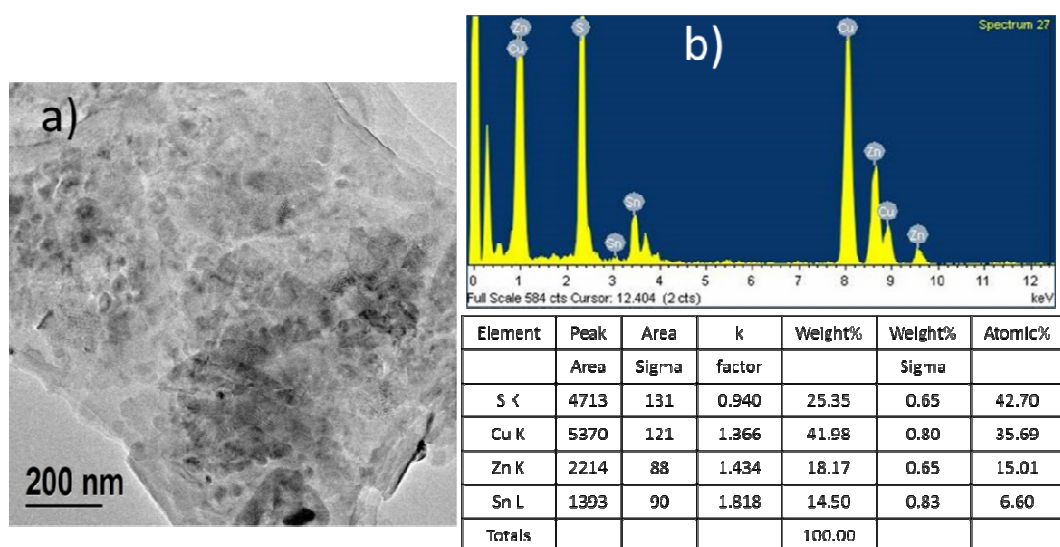

**Fig. S14** (a) The TEM image and (b) EDS spectrum and elemental analysis of CZTS NSs synthesized by cation exchange of  $\text{Cu}_2\text{S}$  NSs in the presence of oleylamine.



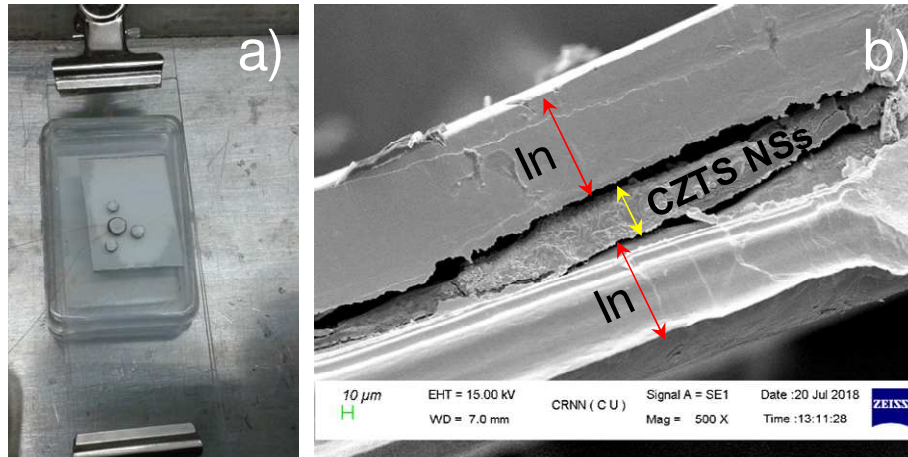

**Fig. S15** (a) Device picture and (b) the cross-sectional SEM image of In-CZTS NSSs-In dielectric device, showing ~50  $\mu\text{m}$  thick CZTS layer between two Indium (In) plate.

**Table S2** A comparison of dielectric properties of established dielectric materials with 2D NCs of CZTS.

| Composition                                                    | $\epsilon'$ | D or $\tan(\delta)$<br>(100 kHz) at 300 K | $\text{TC}_{\epsilon'}$ ( ppm/K)<br>100 kHz at 300 K |
|----------------------------------------------------------------|-------------|-------------------------------------------|------------------------------------------------------|
| $\text{TiO}_2$ [S1]                                            | 110         | 0.015                                     | (-)750                                               |
| $\text{SiO}_2$ [S1]                                            | 3.7         | 0.0015                                    | -                                                    |
| $\text{CaTiO}_3$ [S1]                                          | 130         | 0.11                                      | (-)1600                                              |
| $\text{SrTiO}_3$ [S1]                                          | 285         | 0.006                                     | (-)2400                                              |
| $\text{MgO}$ [S1]                                              | 10          | 0.001                                     | (+)190                                               |
| $\text{MgTiO}_3$ [S1]                                          | 16          | 0.02                                      | (+)100                                               |
| $\text{Al}_2\text{O}_3$ [S1]                                   | 10          | 0.002                                     | (+)120                                               |
| $\text{BaTi}_4\text{O}_9$ [S2]                                 | 37          | 0.0015                                    | (-)110                                               |
| $\text{Ta}_2\text{O}_5$ [S3]                                   | 35          | 0.006                                     | (+)600                                               |
| $\text{Bi}_2\text{Zn}_{1/3}\text{Nb}_{2/3}\text{O}_7$ [S2][S4] | 80          | 0.001                                     | (+)150                                               |
| $\text{HfO}_2$ [S5]                                            | 26          | 0.1                                       | (+)300 to (+) 600                                    |
| $\text{Ho}_2\text{CuTiO}_6$ [S6]                               | 53          | 0.005                                     | (-)64                                                |
| $\text{PbS}$ [S7]                                              | 13          | 0.0012                                    | (+) 51                                               |
| CZTS                                                           | 6.1         | 0.03                                      | 600                                                  |

**Table S3** Fitted results of impedance parameters at different temperatures.

| Temperature (K) | R <sub>1</sub> (Ohm) | CPE <sub>1</sub> (F) | CPE <sub>1</sub> -( $\alpha$ ) | R <sub>2</sub> (+) | CPE <sub>2</sub> (F) | CPE <sub>2</sub> -( $\alpha$ ) |
|-----------------|----------------------|----------------------|--------------------------------|--------------------|----------------------|--------------------------------|
| 280.095         | 2.289E+09            | 6.244E-12            | 1                              | 9.992E+07          | 1.994E-10            | 0.87968                        |
| 290.065         | 1.469E+09            | 7.260E-12            | 1                              | 2.573E+07          | 5.272E-11            | 0.93947                        |
| 300.035         | 7.794E+08            | 8.419E-12            | 0.9886                         | 1.570E+07          | 3.426E-11            | 0.97592                        |
| 310.095         | 3.942E+08            | 8.808E-12            | 1                              | 1.596E+07          | 2.678E-11            | 0.96032                        |
| 320.14          | 2.304E+08            | 1.011E-11            | 0.99739                        | 1.419E+07          | 2.141E-11            | 0.96561                        |
| 330.21          | 1.476E+08            | 1.167E-11            | 0.99307                        | 1.280E+07          | 1.845E-11            | 0.96909                        |
| 340.535         | 1.012E+08            | 1.307E-11            | 0.98571                        | 1.001E+07          | 1.719E-11            | 0.97355                        |
| 350.23          | 7.449E+07            | 1.435E-11            | 0.97947                        | 8.308E+06          | 1.652E-11            | 0.9758                         |

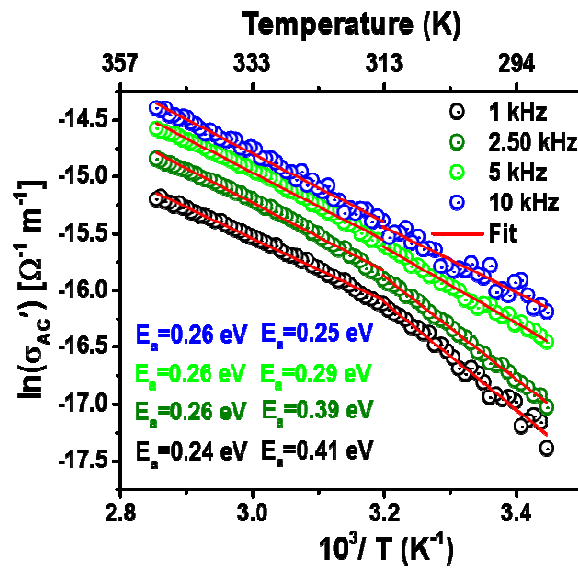

**Fig. S16** AC conductivity ( $\sigma'_{AC}$ ) versus reciprocal of temperature ( $1/T$ ) plots at different frequencies suggests that the activation energy decreases both at lower and higher temperatures with increasing frequencies.

#### References

- S1 G. D. Wilk, R. M. Wallace and J. M. Anthony, *J. Appl. Phys.*, 2001, **89**, 5243-5275.
- S2 M. B. Telli, S. Trolier-McKinstry, D. I. Woodward and I. M. Reaney, *J. Sol-Gel Sci. Technol.*, 2007, **42**, 407-414.
- S3 A. I. Kingon, J. P. Maria and S. K. Streiffer, *Nature*, 2000, **406**, 1032-1038.
- S4 S. Kamba, V. Porokhonsky, A. Pashkin, V. Bovtun, J. Petzelt, J. C. Nino, S. Trolier-McKinstry, M. T. Lanagan and C. A. Randall, *Phys. Rev. B*, 2002, **66**, 054106.
- S5 J. Zhu, Z. G. Liu and Y. R. Li, *J. Phys. D: Appl. Phys.*, 2005, **38**, 446.

- S6 D. Choudhury, A. Venimadhav, C. Kakarla, K. T. Delaney, P. S. Devi, P. Mondal, R. Nirmala, J. Gopalakrishnan, N. A. Spaldin, U. V. Waghmare and D. D. Sarma, *Appl. Phys. Lett.*, 2010, **96**, 162903.
- S7 A. H. Khan, S. Pal, A. Dalui, J. Pradhan, D. D. Sarma and S. Acharya, *Chem. Mater.*, 2017, **29**, 1175-1182.
